# Supplementary material
Source: PubMed Central journal article supplement (PMC7880650)
Supplement: 40699_2020_3582_MOESM1_ESM.pdf [file 40699_2020_3582_MOESM1_ESM.pdf]

**Supplementary table 1.** Characteristics of 16 reported cases of lichen planus in patients with Good syndrome.

| Authors                  | Age (y) /sex | Site of lichen planus                     | Associated immunodeficiency or autoimmune disease                                             | Specific treatment of lichen in combination with thymomectomy |
|--------------------------|--------------|-------------------------------------------|-----------------------------------------------------------------------------------------------|---------------------------------------------------------------|
| Tan                      | 67/M         | OELP, trunk, nails                        | Hypogammaglobulinaemia, alopecia areata                                                       | Systemic steroids, regular plasma exchange transfusions       |
| Gibson and Muller        | NA/M         | Oral, trunk                               | Hypogammaglobulinaemia                                                                        | NA                                                            |
| Rothberg <i>et al.</i>   | 69/M         | OELP, trunk                               | Hypogammaglobulinaemia, B-cell lymphopenia                                                    | NA                                                            |
| McManus <i>et al.</i>    | 41/M         | Oral                                      | Hypogammaglobulinaemia (IgG deficiency), erythroblastopenia                                   | NA                                                            |
| Ghigliotti <i>et al.</i> | 72/F         | OELP, legs, nails                         | Hypogammaglobulinemia (IgA, IgG, IgM deficiency), CD8 lymphocytosis, myasthenia gravis        | Local steroids                                                |
| Hon <i>et al.</i>        | 66/F         | OELP, cicatricial keratoconjunctivitis    | Hypogammaglobulinemia (IgA, IgG, IgM), absence of B cells, CD4 and CD8 lymphopenia            | Antibiotics, colchicine, steroids                             |
| Lolis and Levitt         | 50/F         | Oral                                      | Hypogammaglobulinemia, absence of B cells, CD8 lymphocytosis                                  | Prednisone and cyclosporine                                   |
| Moutasim <i>et al.</i>   | 54/F         | OELP, genital, nails, scalp, volar wrists | Hypogammaglobulinemia, Addison disease, vitiligo, chronic urticaria                           | NA                                                            |
| Seneschal <i>et al.</i>  | 68/M         | OLEP                                      | Hypogammaglobulinemia, B- and T-cell deficiency                                               | Local and oral steroids, oral retinoids, topical tacrolimus   |
| Blanchard <i>et al.</i>  | 85/F         | OLEP                                      | Hypogammaglobulinemia, absence of B cells, CD4 lymphopenia, CD8 lymphocytosis                 | Local steroid, immunoglobulins                                |
| Kaku <i>et al.</i>       | 71/F         | OLEP                                      | Hypogammaglobulinemia (IgA, IgG, IgM), absence of B cells, CD8 lymphocytosis, alopecia areata | Topical steroids, retinoids, antibiotics, antifungal agents   |
| Kralickova <i>et al.</i> | 60/F         | OLEP                                      | Hypogammaglobulinemia (IgA, IgG, IgM), B-cell, CD4 and CD8 lymphopenia                        | NA                                                            |
| MacDonald <i>et al.</i>  | 70/F         | OLEP                                      | Hypogammaglobulinaemia (IgA, IgG, IgM)                                                        | Topical minocycline, systemic cyclosporine                    |
| Maehara <i>et al.</i>    | 48/F         | OLEP                                      | Hypogammaglobulinaemia                                                                        | Immunoglobulins                                               |
| Maehara <i>et al.</i>    | 52/F         | OLEP                                      | Hypogammaglobulinaemia                                                                        | Immunoglobulins, oral steroids                                |

F: female; IgA: immunoglobulin A; IgG: immunoglobulin G; IgM: immunoglobulin M; M: male; OELP: oral erosive lichen planus; NA: not available.
